# Supplementary material
Source: Springer Nature journal article supplement (https://www.springermedizin.de/resource/supplementary/13054_2011_9732_MOESM2_ESM.pdf/9706896)
Supplement: MOESM2 [file 9706896]

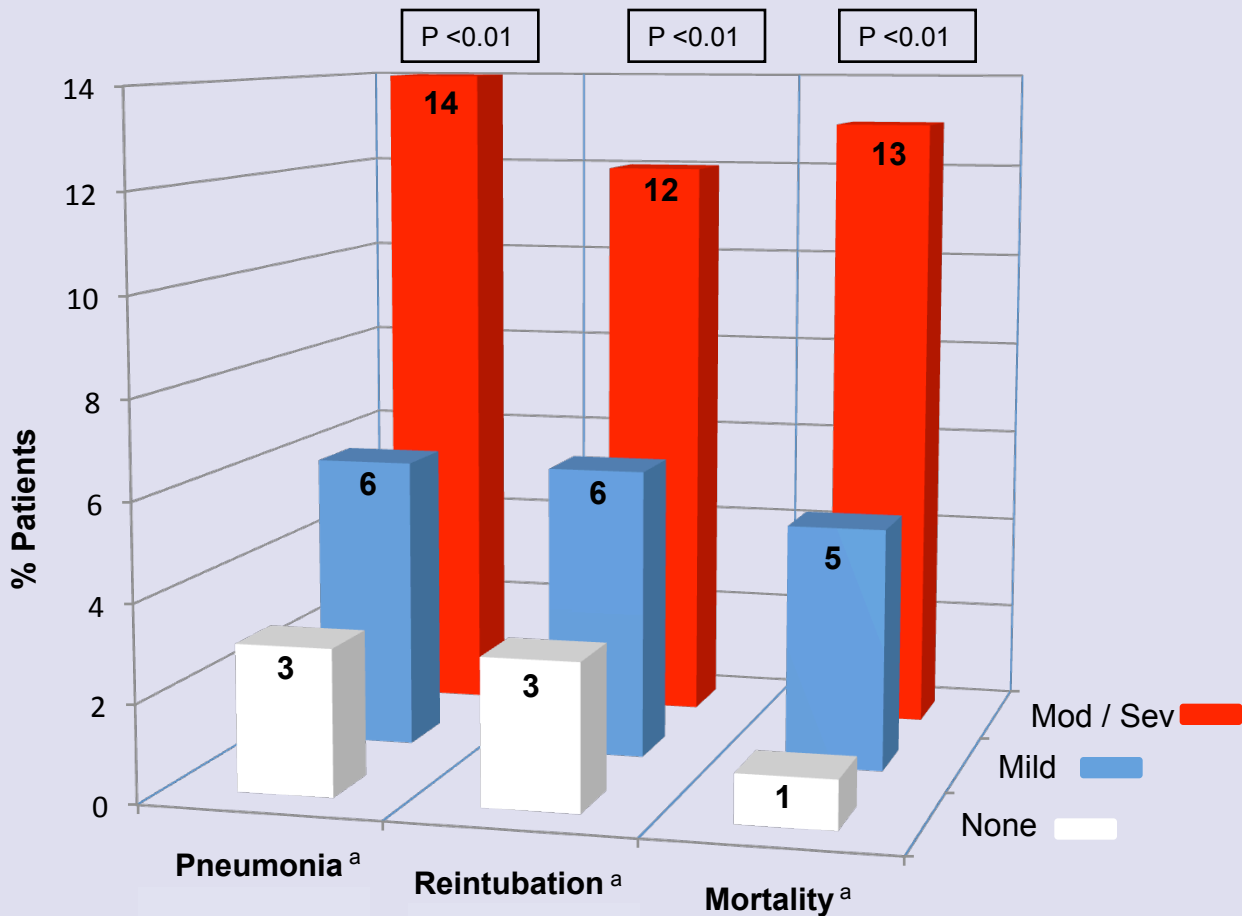

<sup>a</sup> p<0.05 for comparison of moderate / severe dysphagia to no dysphagia, after Bonferonni correction
